# Supplementary material for: A Three-Dimensional Nickel(II) Framework from a Semi-Flexible Bipyrimidyl Ligand Showing Weak Ferromagnetic Behavior
Source: MDPI journal article supplement (doi:10.3390/polym11010119), 2019-01-11
Supplement: s1 [file s1]

# A three-dimensional nickel(II) framework from a semi-flexible bipyrimidyl ligand showing weak ferromagnetic behavior

Shin-Shan Dong and Chen-I Yang\*

Department of Chemistry, Tunghai University, Taichung 407, Taiwan

|                   | Index                                                                                                                                                                          | Page |
|-------------------|--------------------------------------------------------------------------------------------------------------------------------------------------------------------------------|------|
| <b>Figure S1.</b> | Simulated PXRD pattern (red) and experimental PXRD pattern of compound.                                                                                                        | S2   |
| <b>Figure S2.</b> | Thermogravimetric (TG) analysis diagram of compound <b>1</b> .                                                                                                                 | S3   |
| <b>Figure S3.</b> | Plot of $\chi_M$ ( $\circ$ ) vs. $T$ for a powdered sample of compound <b>1</b> .                                                                                              | S4   |
| <b>Figure S4.</b> | Plot of $\chi_M^{-1}$ ( $\circ$ ) vs. $T$ for a powdered sample of compound <b>1</b> . The solid line represents the best fit $\chi_M^{-1}$ above 50 K with a Curie–Weiss law. | S5   |
| <b>Figure S5.</b> | EPR spectra of a powdered compound <b>1</b> collected at 77 K.                                                                                                                 | S6   |

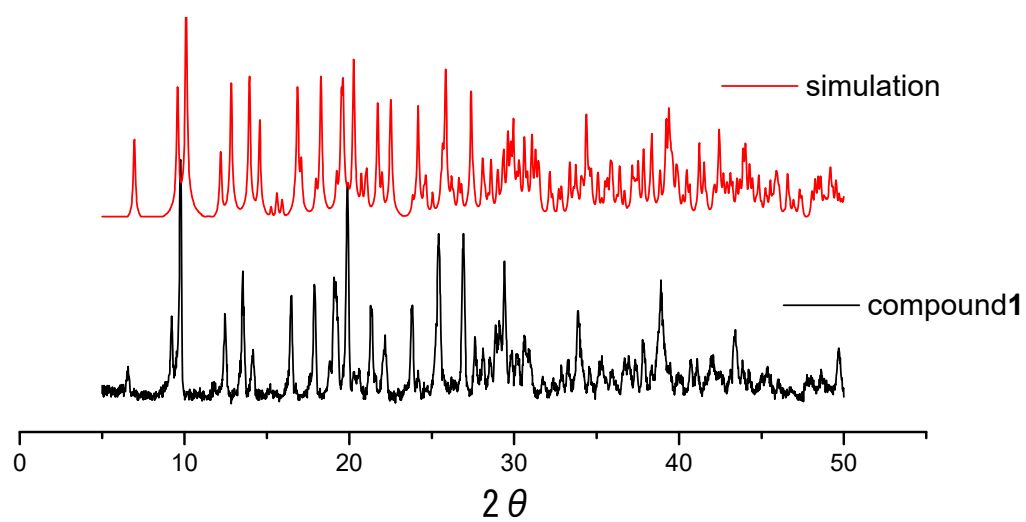

**Figure. S1.** Simulated PXRD pattern (red) and experimental PXRD pattern (black) of compound **1**.

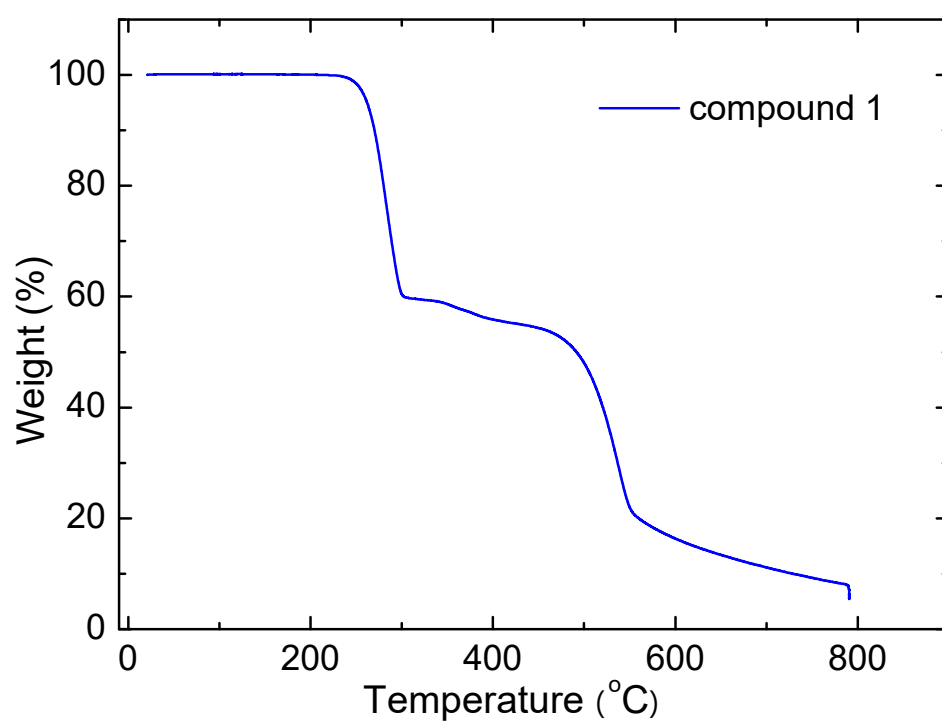

**Figure S2.** Thermogravimetric (TG) analysis diagram of compound **1**.

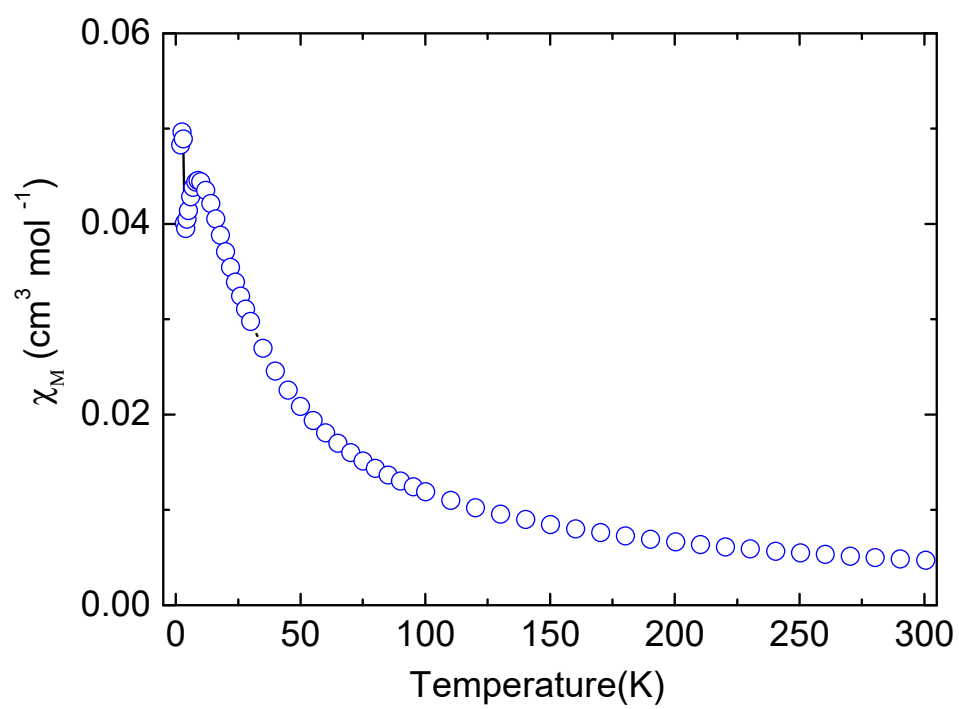

**Figure S3.** Plot of  $\chi_M (\circ)$  vs.  $T$  for a powdered sample of compound **1**.

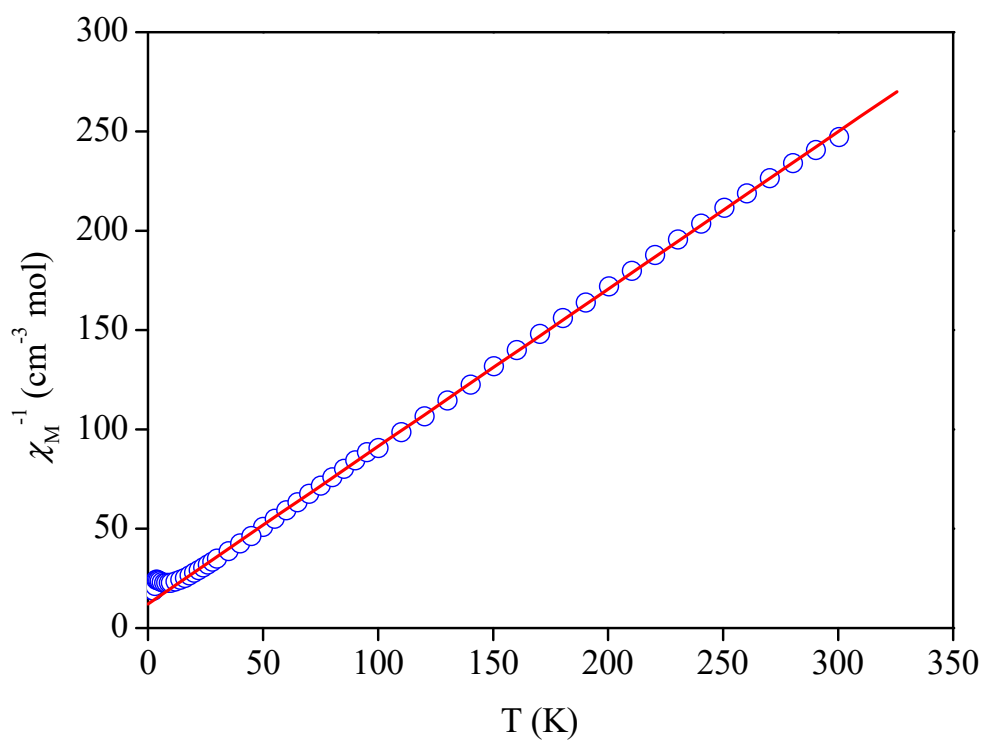

**Figure S4.** Plot of  $\chi_M^{-1}$  ( $\circ$ ) vs.  $T$  for a powdered sample of compound **1**. The solid line represents the best fit  $\chi_M^{-1}$  above 50 K with a Curie–Weiss law.

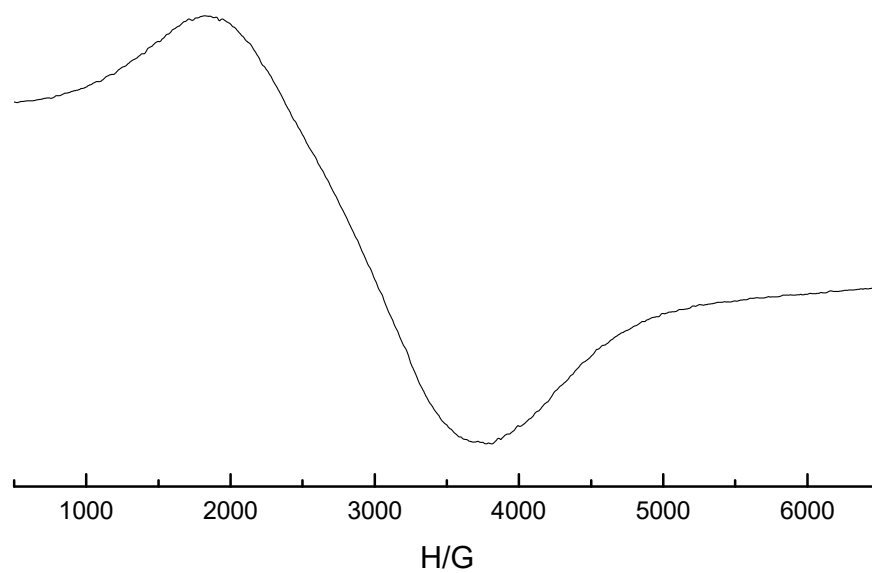

**Figure S5.** EPR spectra of a powdered compound **1** collected at 77 K.
